# Supplementary material for: Characterization of SARS-CoV-2 Omicron BA.4 and BA.5 clinical isolates
Source: Research Square preprint supplement (doi:10.21203/rs.3.rs-1820048/v1), 2022-07-06
Supplement: Supplementary file 1 [file 680e306f491abe463041b9a2.xlsx]

## Sheet: Extended Data Table 1
Extended Data Table 1 Amino acid mutations in the clinical isolates of BA.2, BA.4, and BA.5 used in this study
Protein			Position	Virus (Pango lineage)
				Early SARS-CoV-2 (A)	hCoV-19/Japan/UT-NCD1288-2N-2022 (BA.2)	hCoV-19/USA/ MD/HP30386/ 2022 (BA.4)	hCoV-19/Japan/TY41-703/2022 (BA.4)	SARS-CoV-2/human/USA/COR-22-063113/2022 (BA.5)	hCoV-19/Japan/TY41-702/2022 (BA.5)	hCoV-19/Japan/TY41-704/2022 (BA.5)
ORF1a			135	Ser	Arg	Arg	Arg	Arg	Arg	Arg
			141	Lys	Lys	dela	del	Lys	Lys	Lys
			142	Gly	Gly	del	del	Gly	Gly	Gly
			143	Phe	Phe	del	del	Phe	Phe	Phe
			556	Gln	Gln	Gln	Gln	Gln	Lys	Gln
			842	Thr	Ile	Ile	Ile	Ile	Ile	Ile
			1307	Gly	Ser	Ser	Ser	Ser	Ser	Ser
			2139	Ala	Ala	Ala	Thr	Ala	Ala	Ala
			2153	Thr	Thr	Ile	Thr	Thr	Thr	Thr
			2648	Thr	Thr	Thr	Thr	Thr	Thr	Ile
			3027	Leu	Phe	Phe	Phe	Phe	Phe	Phe
			3090	Thr	Ile	Ile	Ile	Ile	Ile	Ile
			3201	Leu	Phe	Leu	Leu	Leu	Leu	Leu
			3255	Thr	Ile	Ile	Ile	Ile	Ile	Ile
			3395	Pro	His	His	His	His	His	His
			3515	Pro	Pro	Pro	Pro	Leu (62%)	Pro	Pro
			3557	Phe	Phe	Phe	Phe	Phe	Phe	Leu
			3650	Phe	Phe	Phe	Phe	Phe	Leu (85%)	Phe
			3675	Ser	del	del	del	del	del	del
			3676	Gly	del	del	del	del	del	del
			3677	Phe	del	del	del	del	del	del
			3753	Phe	Val (20%)	Phe	Phe	Phe	Phe	Phe
			3829	Leu	Leu	Leu	Phe (71%)	Phe (33%)	Leu	Leu
			4159	Thr	Thr	Ile	Thr	Thr	Thr	Thr
			4391	Leu	Phe (19%)	Leu	Leu	Leu	Leu	Leu
ORF1b			314	Pro	Leu	Leu	Leu	Leu	Leu	Leu
			662	Gly	Val	Gly	Gly	Gly	Gly	Gly
			959	Ser	Pro	Ser	Ser	Ser	Ser	Ser
			1156	Met	Met	Met	Met	Met	Ile	Met
			1161	Pro	Ser (27%)	Pro	Pro	Pro	Pro	Pro
			1315	Arg	Cys	Cys	Cys	Cys	Cys	Cys
			1566	Ile	Val	Val	Val	Val	Val	Val
			2163	Thr	Ile	Ile	Ile	Ile	Ile	Ile
			2497	Leu	Leu	Phe (73%)	Leu	Leu	Leu	Leu
			2513	Ala	Val (18%)	Ala	Ala	Ala	Ala	Ala
S	S1 (1-684)	SP (1-12)	3	Val	Val	Gly	Gly	Val	Val	Val
		NTD (13-304)	19	Thr	Ile	Ile	Ile	Ile	Ile	Ile
			24	Leu	del	del	del	del	del	del
			25	Pro	del	del	del	del	del	del
			26	Pro	del	del	del	del	del	del
			27	Ala	Ser	Ser	Ser	Ser	Ser	Ser
			69	His	His	del	del	del	del	del
			70	Val	Val	del	del	del	del	del
			76	Thr	Thr	Thr	Thr	Ile	Thr	Thr
			142	Gly	Asp	Asp	Asp	Asp	Asp	Asp
			213	Val	Gly	Gly	Gly	Gly	Gly	Gly
		RBD (331-527)	339	Gly	Asp	Asp	Asp	Asp	Asp	Asp
			371	Ser	Phe	Phe	Phe	Phe	Phe	Phe
			373	Ser	Pro	Pro	Pro	Pro	Pro	Pro
			375	Ser	Phe	Phe	Phe	Phe	Phe	Phe
			376	Thr	Ala	Ala	Ala	Ala	Ala	Ala
			405	Asp	Asn	Asn	Asn	Asn	Asn	Asn
			408	Arg	Ser	Ser	Ser	Ser	Ser	Ser
			417	Lys	Asn	Asn	Asn	Asn	Asn	Asn
			440	Asn	Lys	Lys	Lys	Lys	Lys	Lys
			452	Leu	Leu	Arg	Arg	Arg	Arg	Arg
			477	Ser	Asn	Asn	Asn	Asn	Asn	Asn
			478	Thr	Lys	Lys	Lys	Lys	Lys	Lys
			484	Glu	Ala	Ala	Ala	Ala	Ala	Ala
			486	Phe	Phe	Val	Val	Val	Val	Val
			493	Gln	Arg	Gln	Gln	Gln	Gln	Gln
			498	Gln	Arg	Arg	Arg	Arg	Arg	Arg
			501	Asn	Tyr	Tyr	Tyr	Tyr	Tyr	Tyr
			505	Tyr	His	His	His	His	His	His
		SD1/2 (528-684)	614	Asp	Gly	Gly	Gly	Gly	Gly	Gly
			655	His	Tyr	Tyr	Tyr	Tyr	Tyr	Tyr
			679	Asn	Lys	Lys	Lys	Lys	Lys	Lys
			681	Pro	His	His	His	His	His	His
			682	Arg	Arg	Arg	Arg	Arg	Arg	Trp (10%)
	S2 (685-1210)		764	Asn	Lys	Lys	Lys	Lys	Lys	Lys
			796	Asp	Tyr	Tyr	Tyr	Tyr	Tyr	Tyr
			954	Gln	His	His	His	His	His	His
			969	Asn	Lys	Lys	Lys	Lys	Lys	Lys
ORF3a			223	Thr	Ile	Ile	Ile	Ile	Ile	Ile
E			9	Thr	Ile	Ile	Ile	Ile	Ile	Ile
			14	Val	Val	del (57%)	Val	del (48%)	Val	Val
M			3	Asp	Asp	Asp	Asp	Asn	Asn	Asp
			19	Gln	Glu	Glu	Glu	Glu	Glu	Glu
			63	Ala	Thr	Thr	Thr	Thr	Thr	Thr
			131	Arg	Arg	Arg	Arg	Arg	Arg	Thr
ORF6			57	Pro	Pro	Pro	Pro	Pro	Pro	Leu
			61	Asp	Leu	Leu	Leu	Asp	Asp	Asp
ORF7b			10	Pro	Ser	Pro	Pro	Pro	Pro	Pro
			11	Leu	Leu	Phe	Phe	Leu	Leu	Leu
			27	Glu	del	Glu	Glu	Glu	Glu	Glu
			28	Asn	del	Asn	Asn	Asn	Asn	Asn
			29	Ala	del	Ala	Ala	Ala	Ala	Ala
N			13	Pro	Leu	Leu	Leu	Leu	Leu	Leu
			31	Glu	del	del	del	del	del	del
			32	Arg	del	del	del	del	del	del
			33	Ser	del	del	del	del	del	del
			136	Glu	Glu	Glu	Glu	Glu	Asp	Glu
			151	Pro	Pro	Ser	Ser	Pro	Pro	Pro
			203	Arg	Lys	Lys	Lys	Lys	Lys	Lys
			204	Gly	Arg	Arg	Arg	Arg	Arg	Arg
			413	Ser	Arg	Arg	Arg	Arg	Arg	Arg
ORF10			29	Gln	Gln	Gln	Stop (22%)	Gln	Gln	Gln
Compared with the reference strain Wuhan/Hu-1/2019, mutaions are shown. The spike protein is composed of two subunits, S1 and S2. Compared with BA.2 (hCoV-19/Japan/UT-NCD1288-2N/2022), spike protein mutations are shown in bold red for BA.4 and in blod blue for BA.5. ORF, open reading frame; SP, signal peptide; NTD, N-terminal domain; RBD, receptor-binding domain; SD1/2, subdomain 1 and 2; E, Enve…
adel indicates a deletion
